# Supplementary material for: Gender-Specific Associations between CHGB Genetic Variants and Schizophrenia in a Korean Population
Source: PubMed Central journal article supplement — Yonsei Med J. 2017 Mar 15;58(3):619–25. doi: 10.3349/ymj.2017.58.3.619 (PMC5368149; doi:10.3349/ymj.2017.58.3.619), 2017-03-15
Supplement: ymj-58-619-s001.pdf [file ymj-58-619-s001.pdf]

**Supplementary Table 1. Probe Information for *CHGB* Genotyping**

| <b>Loci</b> | <b>Assay on demand ID</b> | <b>Probe sequence</b>     |
|-------------|---------------------------|---------------------------|
| rs236137    | Forward                   | TGTACCTTCTGCTCTACAGAGGTTT |
|             | Reverse                   | CAGGGAATTGAGGAGAAAAGG     |
|             | VIC                       | CTTTCGTGCC                |
|             | FAM                       | CTTTTGTGCC                |
| rs143571308 | Forward                   | TTTTTGGTAGAGACATGGTTTCA   |
|             | Reverse                   | CGCCTGTAATCCCAACACTT      |
|             | VIC                       | CATGCTTCCC                |
|             | FAM                       | CATGTTTCCC                |
| rs236139    | Forward                   | TGTAGCCATTCATTGAGCACA     |
|             | Reverse                   | TGGAACGGAGTGAGACTTCA      |
|             | VIC                       | CTCGCTTGAG                |
|             | FAM                       | CTCGTTTGAG                |
| rs236141    | Forward                   | GCACACATCTCAGCACACAG      |
|             | Reverse                   | CCGAGGGGAGTAGTGCAGAT      |
|             | VIC                       | TACCTTCTCA                |
|             | FAM                       | TACCATCTCA                |
| rs16991480  | Forward                   | AGGAGGCACGCTGGTTTT        |
|             | Reverse                   | CTCCAGGAGGCTGAGAAG        |
|             | VIC                       | CGCCTCGCTT                |
|             | FAM                       | CGCCCCGCTT                |
| rs76791154  | C_102654985_10            |                           |
| rs236145    | C__2516757_1_             |                           |
| rs446659    | Forward                   | CACTTCGCAGCTGTGTGACT      |
|             | Reverse                   | CCAAAGGAAGTCCGGTTCTA      |
|             | VIC                       | GACACTTTC                 |
|             | FAM                       | GACAGTTTGC                |
| rs2284660   | Forward                   | CGGATCACAAGGTCAGGAGA      |
|             | Reverse                   | ACTACAGGCGTGTGCACCA       |
|             | VIC                       | CTAACACAGT                |
|             | FAM                       | CTAATACAGT                |
| rs6085323   | C__327451_10              |                           |
| rs6085324   | C__30484352_10            |                           |
| rs6133278   | Forward                   | CCAACAAAGGCAGACACAGA      |
|             | Reverse                   | CTCAGAATGGCGTGTCTTCA      |
|             | VIC                       | CTCCGACAGC                |
|             | FAM                       | CTCCAACAGC                |
| rs910122    | Forward                   | TGAAGACACGCCATTCTGAG      |
|             | Reverse                   | TCCTGGCTCTTCAAGGTGTT      |
|             | VIC                       | GAGCAAGGGG                |
|             | FAM                       | GAGCGAGGGG                |
| rs881118    | Forward                   | AACACCTTGAAGAGCCAGGA      |
|             | Reverse                   | GTTTCCGATCTGGCCACTAA      |
|             | VIC                       | TCTCAATGAA                |
|             | FAM                       | TCTCCATGAA                |
| rs742711    | C__2245774_20             |                           |
| rs74621755  | Forward                   | TGGAAGAGCTGGACAGAAA       |
|             | Reverse                   | CAGCTGTGTGATGGGAGCTA      |
|             | VIC                       | GCTAGGTTTC                |
|             | FAM                       | GCTAAGTTTC                |
| rs2821      | C__8953809_1_             |                           |

*CHGB*, chromogranin B.
