# Supplementary material for: Gender-Specific Associations between CHGB Genetic Variants and Schizophrenia in a Korean Population
Source: PubMed Central journal article supplement — Yonsei Med J. 2017 Mar 15;58(3):619–25. doi: 10.3349/ymj.2017.58.3.619 (PMC5368149; doi:10.3349/ymj.2017.58.3.619), 2017-03-15
Supplement: ymj-58-619-s002.pdf [file ymj-58-619-s002.pdf]

**Supplementary Table 2.** Comparison of Genetic Associations of *CHGB* SNPs with Schizophrenia in Previous Studies

| Loci       | Variation | AA change | This study              |       |                   |                    |                   | Other study             |      |                   |                     |                         |      |                   |                       |
|------------|-----------|-----------|-------------------------|-------|-------------------|--------------------|-------------------|-------------------------|------|-------------------|---------------------|-------------------------|------|-------------------|-----------------------|
|            |           |           | Korean                  |       |                   |                    |                   | Chinese <sup>13</sup>   |      |                   |                     | Japanese <sup>9</sup>   |      |                   |                       |
|            |           |           | Subjects (310 vs. 604)* |       |                   |                    |                   | Subjects (308 vs. 260)* |      |                   |                     | Subjects (192 vs. 192)* |      |                   |                       |
|            |           |           | MAF                     |       | OR                | p value            | p <sub>corr</sub> | MAF                     |      | OR                | p value             | MAF                     |      | OR                | p value               |
| Case       | Control   | Case      | Control                 | Case  |                   |                    |                   | Control                 |      |                   |                     |                         |      |                   |                       |
| rs236137   | C>T       |           | 0.117                   | 0.132 | 0.87              | 0.36               | -                 | -                       | -    | -                 | -                   | -                       | -    | -                 |                       |
| rs236139   | C>T       |           | 0.434                   | 0.403 | 1.11              | 0.34               | -                 | -                       | -    | -                 | -                   | -                       | -    | -                 |                       |
| rs236141   | T>A       |           | 0.089                   | 0.100 | 0.82              | 0.26               | -                 | -                       | -    | -                 | -                   | -                       | -    | -                 |                       |
| rs16991480 | T>C       |           | 0.229                   | 0.262 | 0.86              | 0.21               | -                 | -                       | -    | -                 | -                   | -                       | -    | -                 |                       |
| rs76791154 | A>G       |           | 0.229                   | 0.262 | 0.86              | 0.22               | -                 | -                       | -    | -                 | -                   | -                       | -    | -                 |                       |
| rs236145   | C>G       |           | 0.304                   | 0.352 | 0.83              | 0.09               | -                 | -                       | -    | -                 | -                   | -                       | -    | -                 |                       |
| rs446659   | C>G       |           | 0.383                   | 0.443 | 0.78 <sup>†</sup> | 0.02 <sup>†</sup>  | NS                | -                       | -    | -                 | -                   | -                       | -    | -                 |                       |
| rs6085323  | C>T       |           | 0.079                   | 0.089 | 0.80              | 0.24               | -                 | -                       | -    | -                 | -                   | -                       | -    | -                 |                       |
| rs6085324  | T>A       | Ser93Thr  | 0.442                   | 0.402 | 1.17              | 0.14               | -                 | -                       | -    | -                 | 0.37                | 0.39                    | 0.94 | 0.68              |                       |
| rs6133278  | G>A       | Asp145Asn | 0.293                   | 0.352 | 0.78 <sup>†</sup> | 0.02 <sup>†</sup>  | NS                | 0.27                    | 0.38 | 1.60 <sup>†</sup> | 0.004 <sup>†</sup>  | 0.37                    | 0.37 | 0.99              | 0.94                  |
| rs910122   | A>G       | Arg178Gln | 0.392                   | 0.464 | 0.74 <sup>†</sup> | 0.004 <sup>†</sup> | 0.04 <sup>†</sup> | 0.32                    | 0.45 | 1.73 <sup>†</sup> | 0.0005 <sup>†</sup> | 0.52                    | 0.49 | 0.87              | 0.34                  |
| rs881118   | A>C       | Asn200His | 0.166                   | 0.139 | 1.28              | 0.08               | -                 | -                       | -    | -                 | -                   | 0.12                    | 0.11 | 1.12              | 0.61                  |
| rs236152   | C>G       | Arg353Gly | -                       | -     | -                 | -                  | -                 | -                       | -    | -                 | -                   | 0.67                    | 0.51 | 1.96 <sup>†</sup> | 5.9×10 <sup>-6†</sup> |
| rs236153   | A>G       | Glu368Glu | -                       | -     | -                 | -                  | -                 | -                       | -    | -                 | -                   | 0.69                    | 0.51 | 2.11 <sup>†</sup> | 6.2×10 <sup>-7†</sup> |
| rs742711   | G>A       | Arg417His | 0.445                   | 0.403 | 1.18              | 0.12               | -                 | -                       | -    | -                 | -                   | 0.51                    | 0.41 | 1.51 <sup>†</sup> | 0.005 <sup>†</sup>    |
| rs74621755 | G>A       | Arg500Ly  | 0.065                   | 0.086 | 0.74              | 0.13               | -                 | -                       | -    | -                 | -                   | 0.06                    | 0.09 | 0.67              | 0.15                  |
| rs236155   | C>A       |           | -                       | -     | -                 | -                  | -                 | 0.36                    | 0.47 | 1.52 <sup>†</sup> | 0.002 <sup>†</sup>  | -                       | -    | -                 | -                     |
| rs2821     | C>A       |           | 0.378                   | 0.458 | 0.72 <sup>†</sup> | 0.002 <sup>†</sup> | 0.02 <sup>†</sup> | 0.36                    | 0.45 | 1.48 <sup>†</sup> | 0.004 <sup>†</sup>  | -                       | -    | -                 | -                     |

\*Number of schizophrenia patients vs. number of controls, <sup>†</sup>Statistical significance of  $p < 0.05$ .

AA, amino acid; MAF, minor allele frequency; OR, odds ratio; SNP, single nucleotide polymorphism; *CHGB*, *chromogranin B*.
